# Supplementary material
Source: MDPI journal article supplement (https://www.mdpi.com/2225-1154/9/7/120)
Supplement: s1 [file s1]

## Supplementary Materials: Trends of Hydroclimatic Intensity in Colombia

Oscar Mesa <sup>1,†,\*</sup> , Viviana Urrea <sup>1,†</sup>  and Andrés Ochoa <sup>1,†</sup> 

We analyzed precipitation data both from rain gauges and the Climate Hazards Group InfraRed Precipitation with Station database (CHIRPS) [1]. The gauges are in 1706 sites in the whole territory of Colombia from the Colombian Meteorological Service (IDEAM) rain gauge network. Data comprise daily time series of rainfall amounts. We also used.

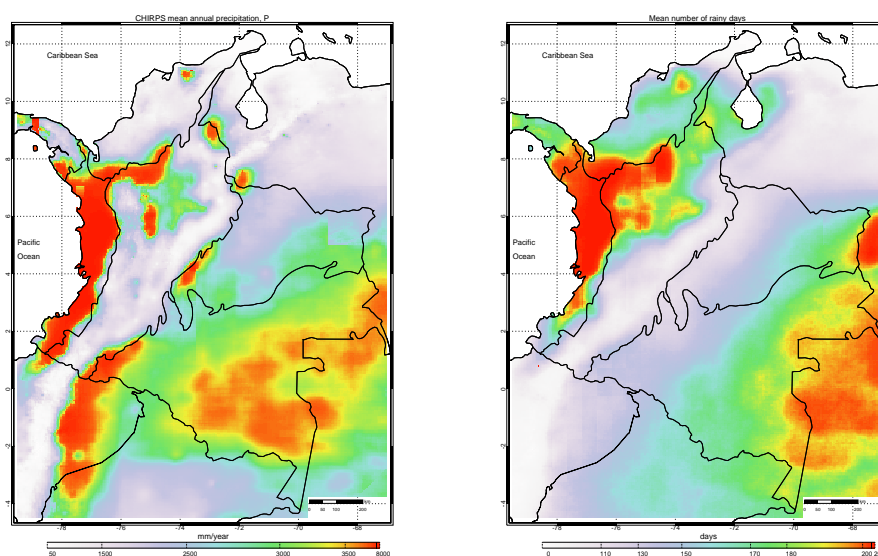

**Figure S1.** Mean annual precipitation over the period 1981-2018 from the CHIRPS database (left). Mean annual number of rainy days over the same period (right).

Table S1 presents the confusion matrix that illustrates the need to consider the auto-correlation of the series in estimating trends for the variables of this study.

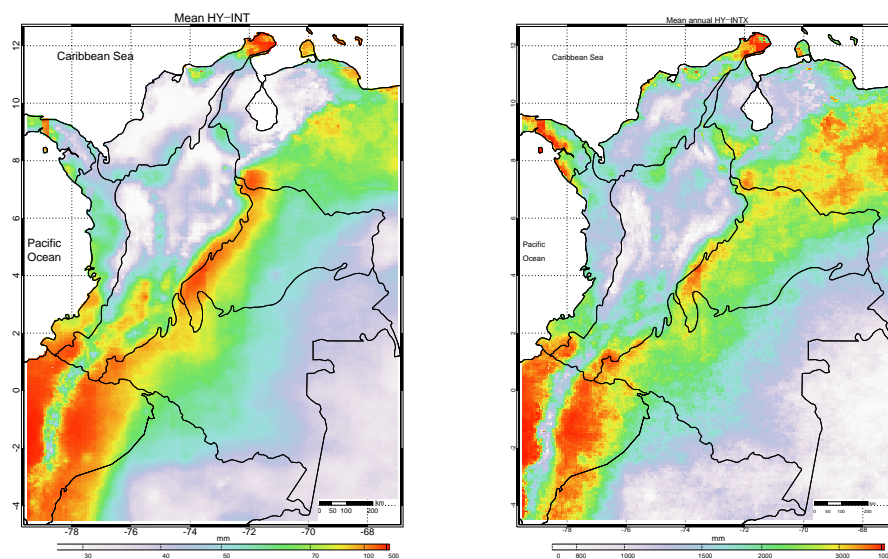

**Figure S2.** Average HY-INT over the period 1981-2018 from the CHIRPS database (left). Average HY-INTX over the same period (right).

Table S2 shows a sensitivity analysis of the results obtained using the different filters of the rain gauge data.

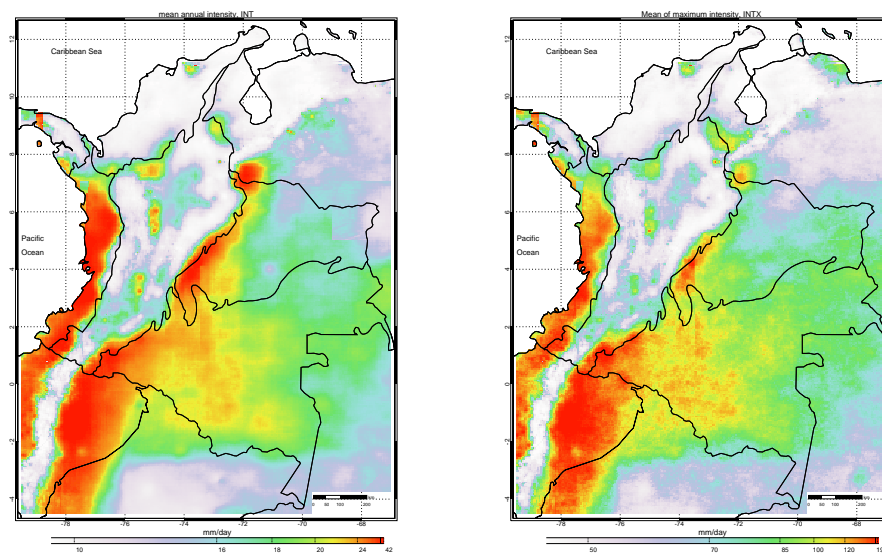

**Figure S3.** Mean average intensity over the period 1981-2018 from the CHIRPS database (left). Mean maximum intensity over the same period (right).

Table S3 presents a regional summary of the trends of the main variables studied.



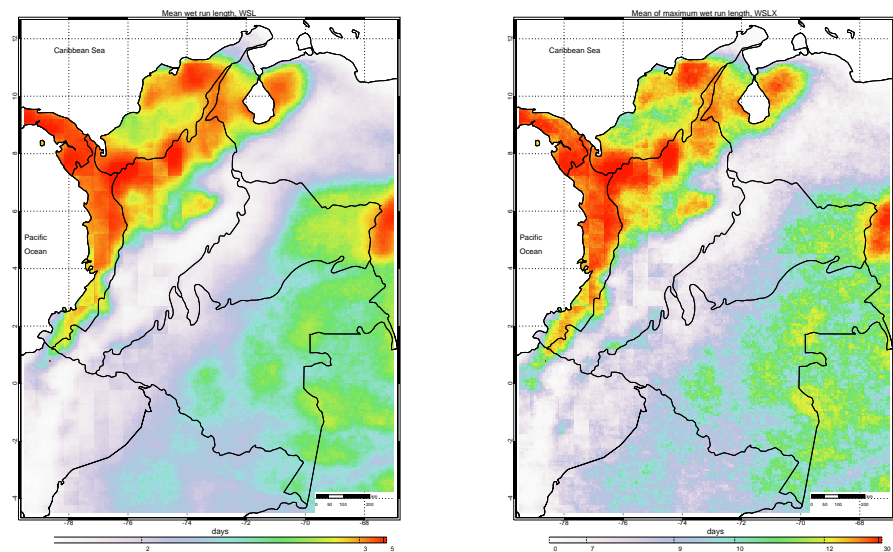

**Figure S4.** Mean wet run length over the period 1981-2018 from the CHIRPS database (left). Mean maximum wet run length over the same period (right).

Figure S1 presents a map of the mean annual precipitation over Colombia. Similar maps for the averages of the other variables considered in this study are in Figures S2 to S6. Figure S7 shows the histograms of the spatial distribution of the mean annual precipitation and the mean annual number of rainy days.

**Table S1.** Confusion matrices for the evaluation method of the significance of the trends for each of the indicated variables without taking into account autocorrelation. For the illustration, the Mann-Kendall test with autocorrelation is considered the true one. The Table shows the results for the fourth sensitivity rain gauge dataset, but notice the similarity among all datasets. True trend means that both methods give significant trends. A false trend is when ignoring autocorrelation gives a significant trend but it is non-significant if it is considered. A false no trend is when the roles are inverted. A true no trend is when both methods indicate non-significant trend.

| Variable                                                    | true trend | false trend | false no trend | true no trend |
|-------------------------------------------------------------|------------|-------------|----------------|---------------|
| Number of gauges (Percentage of the total number of gauges) |            |             |                |               |
| P                                                           | 45 (3%)    | 293 (18%)   | 180 (11%)      | 1111 (68%)    |
| INT                                                         | 116 (7%)   | 400 (25%)   | 245 (15%)      | 868 (53%)     |
| DSL                                                         | 62 (4%)    | 316 (19%)   | 184 (11%)      | 1067 (66%)    |
| HY-INT                                                      | 108 (7%)   | 393 (24%)   | 212 (13%)      | 916 (56%)     |

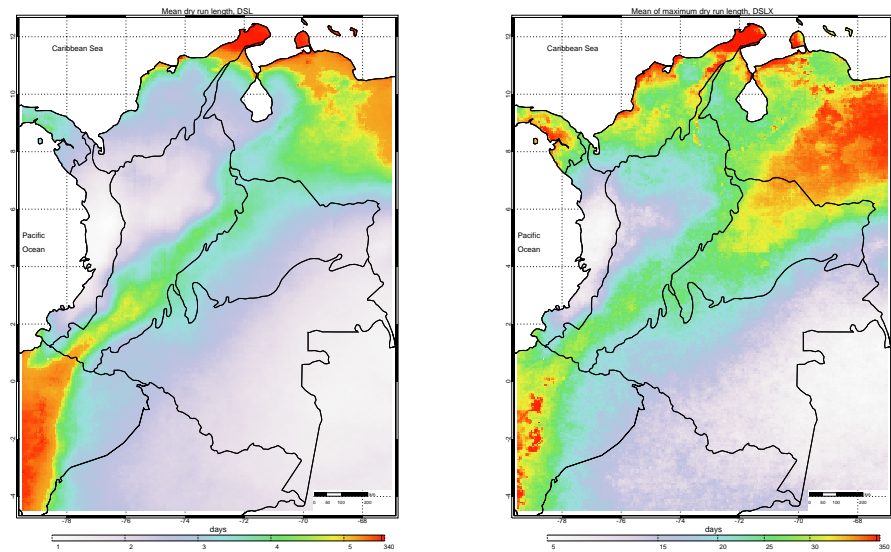

**Figure S5.** Mean dry run length over the period 1981-2018 from the CHIRPS database (left). Mean maximum dry run length over the same period (right).

Figure S8 shows examples of trend analysis for two stations. Figure S9 presents the trend slope of the histograms of the total annual precipitation, the number of wet days in the year, and the number of wet spells. Figures S10 and S11 present maps of the trend slope for the number of wet days, the number of wet runs, the average length of wet runs, and the maximum length of wet runs.

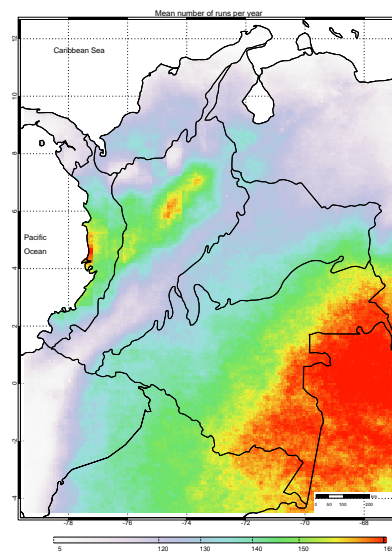

**Figure S6.** Mean number of runs over the period 1981-2018 from the CHIRPS database

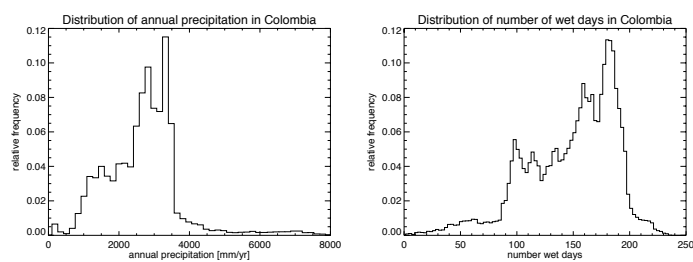

**Figure S7.** Histograms of mean annual precipitation over the period 1981–2018 from the CHIRPS database (left) and mean annual number of rainy days over the same period (right).

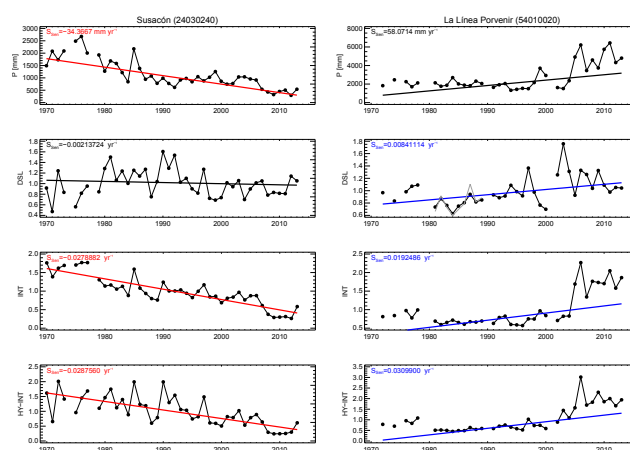

**Figure S8.** Two examples of trend analysis for (top to bottom) P, DSL, INT, and HY-INT for two representative stations, left panel: Susacón in Boyacá, at 2550 m.a.s.l., right panel: La Línea El Porvenir in Risaralda, at 1955 m.a.s.l.



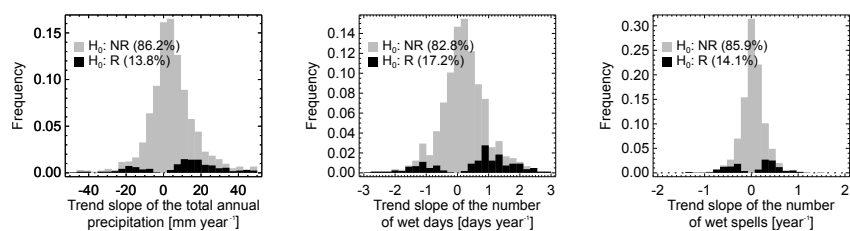

**Figure S9.** Same as Figure ?? for the trend slope of the total annual precipitation (left), the number of wet days in the year (center) and the number of wet spells in the year (right).

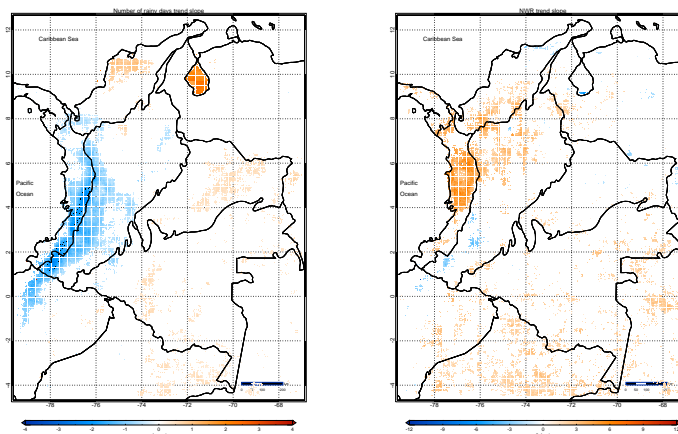

**Figure S10.** Maps of the trend slope for the number of wet days (left) and the number of wet runs (right) for the CHIRPS dataset. Non-significant trends are not plotted.

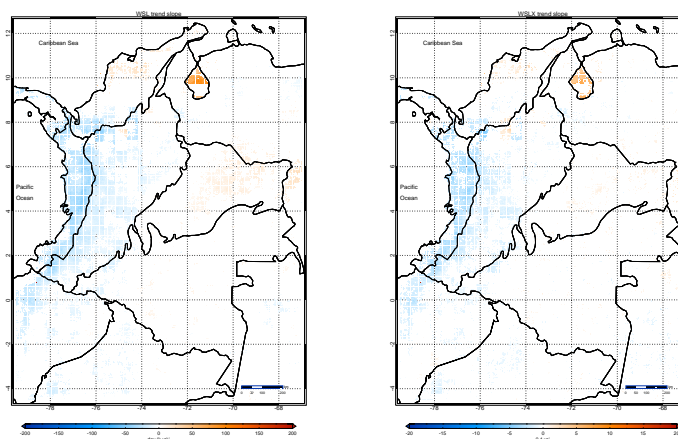

**Figure S11.** Maps of the trend slope for the average length of wet runs (left) and the maximum length of wet runs (right) for the CHIRPS dataset. Non-significant trends are not plotted.

**Table S2.** Comparison of sensitivity alternatives for data filtering. Percentage of stations with a significant trend for each of the four sensitivity datasets (%S1 to %S4) and percentage of those with positive trends (%P1 to %P4). Variable symbols are the same as in Table ??.

| Variable   | %S1 | %S2  | %S3  | %S4  | %P1 | %P2 | %P3 | %P4 |
|------------|-----|------|------|------|-----|-----|-----|-----|
| N Gauges   | 355 | 1345 | 1320 | 1629 |     |     |     |     |
| P          | 12  | 13   | 14   | 14   | 80  | 81  | 82  | 73  |
| INT        | 21  | 20   | 19   | 22   | 49  | 56  | 59  | 57  |
| DSL        | 18  | 16   | 15   | 15   | 17  | 18  | 20  | 31  |
| HY-INT     | 22  | 18   | 18   | 20   | 29  | 33  | 34  | 40  |
| N Wet Days | 18  | 17   | 17   | 17   | 74  | 81  | 80  | 71  |
| WSL        | 20  | 19   | 17   | 18   | 83  | 75  | 74  | 64  |
| N Wet Runs | 17  | 15   | 14   | 14   | 66  | 64  | 62  | 58  |
| INTX       | 11  | 9    | 10   | 9    | 68  | 62  | 64  | 57  |
| DSLX       | 11  | 9    | 10   | 9    | 34  | 27  | 26  | 20  |
| HY-INTX    | 10  | 9    | 10   | 9    | 43  | 34  | 37  | 26  |
| WSLX       | 17  | 14   | 14   | 14   | 77  | 74  | 71  | 64  |

**Table S3.** Regional summary of the trends of all the variables studied, for the base rain gauges and the CHIRPS datasets. Column symbols as in Table ???. The number of stations and pixels for each region are: Amazon, 12 and 14006; Andes, 622 and 9741; Caribbean, 207 and 3901; Orinoco, 30 and 6729; and Pacific, 38 and 2635 respectively.

| Region                     | % SIG<br>Gauges | % INC | % SIG<br>CHIRPS | % INC |
|----------------------------|-----------------|-------|-----------------|-------|
| Total Annual Precipitation |                 |       |                 |       |
| Amazon                     | 0               | -NaN  | 10              | 80    |
| Andes                      | 13              | 73    | 6               | 84    |
| Caribbean                  | 14              | 90    | 5               | 97    |
| Orinoco                    | 17              | 80    | 8               | 50    |
| Pacific                    | 24              | 100   | 28              | 77    |
| Total                      | 13              | 79    | 10              | 76    |
| HY-INT                     |                 |       |                 |       |
| Amazon                     | 25              | 0     | 12              | 0     |
| Andes                      | 20              | 30    | 31              | 79    |
| Caribbean                  | 21              | 36    | 38              | 4     |
| Orinoco                    | 17              | 60    | 22              | 0     |
| Pacific                    | 37              | 43    | 31              | 100   |
| Total                      | 21              | 33    | 23              | 39    |
| INTX, Maximum Intensity    |                 |       |                 |       |
| Amazon                     | 17              | 0     | 4               | 43    |
| Andes                      | 11              | 62    | 20              | 53    |
| Caribbean                  | 8               | 63    | 22              | 5     |
| Orinoco                    | 7               | 100   | 12              | 12    |
| Pacific                    | 8               | 67    | 17              | 100   |
| Total                      | 10              | 62    | 13              | 41    |
| HY-INTX                    |                 |       |                 |       |
| Amazon                     | 8               | 0     | 5               | 17    |
| Andes                      | 11              | 39    | 13              | 71    |
| Caribbean                  | 6               | 58    | 12              | 26    |
| Orinoco                    | 7               | 100   | 6               | 3     |
| Pacific                    | 24              | 0     | 15              | 100   |
| Total                      | 10              | 38    | 9               | 48    |

| Continuation of Table S3 |                 |       |                 |       |
|--------------------------|-----------------|-------|-----------------|-------|
| Region                   | % SIG<br>Gauges | % INC | % SIG<br>CHIRPS | % INC |
| INT                      |                 |       |                 |       |
| Amazon                   | 17              | 0     | 12              | 8     |
| Andes                    | 20              | 52    | 34              | 89    |
| Caribbean                | 25              | 60    | 20              | 38    |
| Orinoco                  | 20              | 67    | 37              | 1     |
| Pacific                  | 24              | 67    | 43              | 100   |
| Total                    | 21              | 55    | 25              | 48    |
| DSL                      |                 |       |                 |       |
| Amazon                   | 8               | 0     | 7               | 6     |
| Andes                    | 16              | 23    | 15              | 81    |
| Caribbean                | 17              | 14    | 12              | 1     |
| Orinoco                  | 17              | 20    | 2               | 0     |
| Pacific                  | 37              | 14    | 22              | 99    |
| Total                    | 17              | 20    | 10              | 51    |
| N Wet Days               |                 |       |                 |       |
| Amazon                   | 8               | 100   | 6               | 86    |
| Andes                    | 19              | 85    | 32              | 2     |
| Caribbean                | 15              | 77    | 19              | 70    |
| Orinoco                  | 20              | 33    | 15              | 100   |
| Pacific                  | 32              | 58    | 59              | 0     |
| Total                    | 18              | 80    | 20              | 32    |
| N Wet Runs               |                 |       |                 |       |
| Amazon                   | 17              | 50    | 7               | 100   |
| Andes                    | 13              | 55    | 18              | 87    |
| Caribbean                | 17              | 86    | 19              | 91    |
| Orinoco                  | 23              | 71    | 2               | 90    |
| Pacific                  | 26              | 80    | 51              | 100   |
| Total                    | 15              | 66    | 14              | 94    |
| WSL                      |                 |       |                 |       |
| Amazon                   | 8               | 0     | 4               | 38    |
| Andes                    | 18              | 82    | 46              | 2     |
| Caribbean                | 20              | 66    | 23              | 42    |
| Orinoco                  | 30              | 44    | 19              | 100   |
| Pacific                  | 29              | 46    | 78              | 0     |
| Total                    | 19              | 74    | 25              | 21    |



| Continuation of Table S3 |        |       |        |       |
|--------------------------|--------|-------|--------|-------|
| Region                   | % SIG  | % INC | % SIG  | % INC |
|                          | Gauges |       | CHIRPS |       |
| WSLX                     |        |       |        |       |
| Amazon                   | 0      | -NaN  | 5      | 36    |
| Andes                    | 14     | 81    | 34     | 4     |
| Caribbean                | 15     | 61    | 13     | 55    |
| Orinoco                  | 10     | 67    | 8      | 90    |
| Pacific                  | 24     | 44    | 69     | 0     |
| Total                    | 15     | 74    | 18     | 16    |
| DSLX                     |        |       |        |       |
| Amazon                   | 8      | 0     | 6      | 15    |
| Andes                    | 10     | 31    | 5      | 82    |
| Caribbean                | 8      | 53    | 3      | 77    |
| Orinoco                  | 0      | -NaN  | 4      | 13    |
| Pacific                  | 29     | 0     | 12     | 100   |
| Total                    | 10     | 31    | 5      | 47    |

## References

1. Funk, C.; Peterson, P.; Landsfeld, M.; Pedreros, D.; Verdin, J.; Shukla, S.; Husak, G.; Rowland, J.; Harrison, L.; Hoell, A.; et al. The climate hazards infrared precipitation with stations—A new environmental record for monitoring extremes. *Sci. Data* **2015**, *2*, doi:10.1038/sdata.2015.66.
